# Supplementary material for: A bioreducible N-oxide-based probe for photoacoustic imaging of hypoxia
Source: PubMed Central journal article supplement (PMC5702603; doi:10.1038/s41467-017-01951-0), 2017-11-27
Supplement: 41467_2017_1951_MOESM2_ESM.pdf [file 41467_2017_1951_MOESM2_ESM.pdf]

## **Description of Additional Supplementary Files**

File Name: Supplementary Movie 1

Description: 3D PA Reconstruction of in vivo imaging of a hypoxic tumor with HyP-1
